# Supplementary material for: Overexpressed DEPDC1B contributes to the progression of hepatocellular carcinoma by CDK1
Source: publisher site journal article supplement (doi:10.18632/aging.203016), 2021-05-25
Supplement: Supplementary file [file aging-v13i16-203016-supplementary-material-SD1.pdf]

**SUPPLEMENTARY FIGURE**

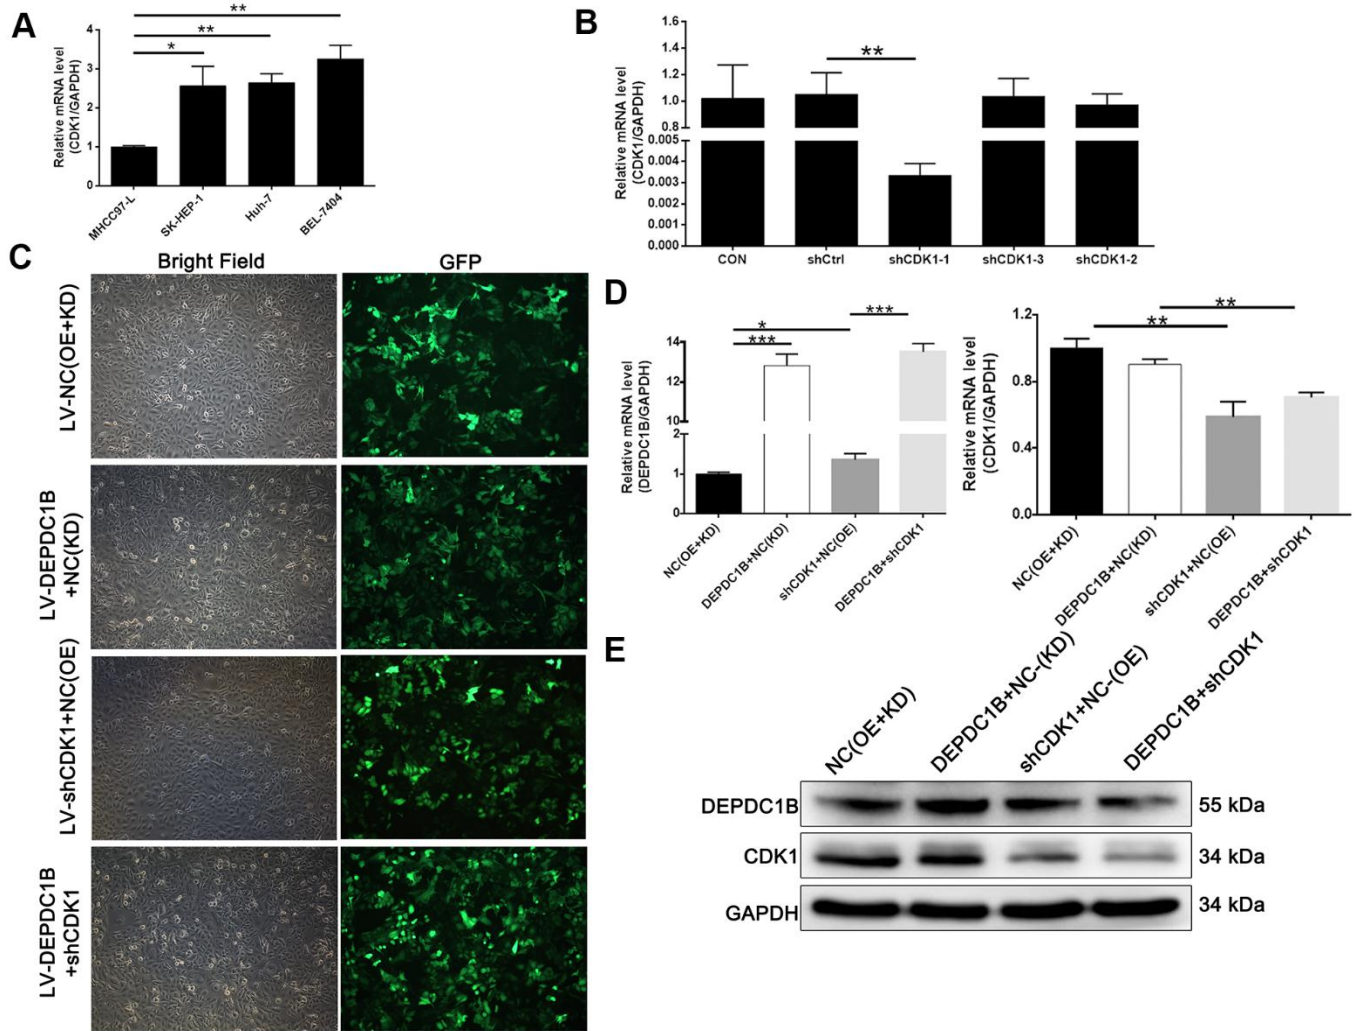

**Supplementary Figure 1. Successful establishment of CDK1 knockdown and DEPDC1B overexpression.** (A) Compared with the MHCC97-L cells, CDK1 is highly expressed in SK-HEP-1, Huh-7 and BEL-7404 cells ( $P < 0.05$ ). (B) The results of qRT-PCR show that, in SK-HEP-1 cells, after the infection of lentivirus, compared with the shCtrl group: The knockdown efficiency of CDK1 in shCDK1-1 group is 99.7% ( $P < 0.01$ ). (C) The fluorescence of cells, which were infected with 4 groups for 72 h, observed by microscope demonstrates a  $>80\%$  efficiency of infection and the normal cell condition. (D) After infection, compared to NC group: DEPDC1B mRNA level of DEPDC1B+NC(KD) group increased obviously ( $P < 0.001$ ), but CDK1 mRNA level had no significant change, and DEPDC1B mRNA level of shCDK1+NC(OE) group increased obviously ( $P < 0.05$ ), but CDK1 mRNA level decreased obviously ( $P < 0.01$ ). Compared to DEPDC1B+NC(KD) group, DEPDC1B mRNA level of DEPDC1B+shCDK1 group had no significant change, but CDK1 mRNA level decreased obviously ( $P < 0.01$ ). Compared with shCDK1+NC(OE) group, DEPDC1B mRNA level of DEPDC1B+shCDK1 group increased obviously ( $P < 0.001$ ), but CDK1 mRNA level had no significant change. (E) The results of Western blot show that, compared to NC group: DEPDC1B protein level of DEPDC1B+NC(KD) group increased obviously, CDK1 protein level had no significant change, and DEPDC1B protein level of shCDK1+NC(OE) group increased obviously, but CDK1 protein level decreased obviously. Compared with DEPDC1B+NC(KD) group, DEPDC1B and CDK1 protein level of DEPDC1B+shCDK1 group decreased obviously. Compared to shCDK1+NC(OE) group, DEPDC1B and CDK1 protein level of DEPDC1B+shCDK1 group decreased obviously. \*:  $P < 0.05$ . \*\*:  $P < 0.01$ . \*\*\*:  $P < 0.001$ .
