# Supplementary material for: Overexpressed DEPDC1B contributes to the progression of hepatocellular carcinoma by CDK1
Source: publisher site journal article supplement (doi:10.18632/aging.203016), 2021-05-25
Supplement: Supplementary file [file aging-v13i16-203016-supplementary-material-SD2.pdf]

## SUPPLEMENTARY TABLES

**Supplementary Table 1. shRNA sequences for vector construction.**

| Target gene               | Code              | Primer (5'-3')                                                                                                                           |
|---------------------------|-------------------|------------------------------------------------------------------------------------------------------------------------------------------|
| DEPDC1B<br>knock down     |                   | F: CCGGGCTGCTAGATTGGTAACGTTTCTCGA<br>GAAACGTTACCAATCTAGCAGCTTTTTG<br>R: AATTCAAAAAGCTGCTAGATTGGTAACGTT<br>TCTCGAGAAACGTTACCAATCTAGCAGC   |
|                           | CDK1<br>knockdown | F: CCGGTTCCATGGATCTGAAGAAATACTCGA<br>GTATTTCTTCAGATCCATGGAATTTTTG<br>R: AATTCAAAAATCCATGGATCTGAAGAAAT<br>ACTCGAGTATTTCTTCAGATCCATGGAA    |
| 2                         |                   | F: CCGGAGACTAGAAAGTGAAGAGGAACTCGA<br>GTTCTTCTCACTTTCTAGTCTTTTTTG<br>R: AATTCAAAAAAGACTAGAAAGTGAAGAGGA<br>ACTCGAGTTCCTCTCACTTTCTAGTCT     |
| 3                         |                   | F: CCGGATGGAGTTGTGTATAAGGGTACTCGAG<br>TACCCTTATACACA ACTCCATTTTTTG<br>R: AATTCAAAAAATGGAGTTGTGTATAAGGGTAC<br>TCGAGTACCCTTATACACA ACTCCAT |
| DEPDC1B<br>overexpression |                   | F: GATTCTAGAGCTAGCGAATTCCGCCACCATGG<br>AGCATCGCATCGTGGGGCC<br>R: TCCTTCGCGGCCGCGGATCCTTACATTCGAAAA<br>CTTCTAGTTCTTTGAAATGG               |

F, Forward; R, Reverse.

**Supplementary Table 2. Primer sequences for quantitative PCR.**

| Target gene | Primer (5'-3')                                        |
|-------------|-------------------------------------------------------|
| GAPDH       | F: TGACTTCAACAGCGACACCCA<br>R: CACCCTGTTGCTGTAGCCAAA  |
| DEPDC1B     | F: CTGAAGTGACCCGCAAACAAA<br>R: CTGGTGGGAGATCATTCCATTC |
| CDK1        | F: CCATACCCATTGACTAACTAT<br>R: ACCCCTTCCTCTCACTTTC    |

F, Forward; R, Reverse.

**Supplementary Table 3. Characteristics of antibodies used in the study.**

| <b>Antigen</b>       | <b>Application</b> | <b>Origin</b>             | <b>Cat. No.</b> | <b>Dilution</b> |
|----------------------|--------------------|---------------------------|-----------------|-----------------|
| Primary antibodies   |                    |                           |                 |                 |
| DEPDC1B              | WB, Co-IP          | Abcam, Cambridge, MA, USA | ab124182        | 1:1000          |
| GAPDH                | WB, Co-IP          | Bioworld                  | AP0063          | 1:3000          |
| Akt                  | WB                 | CST, Danvers, MA, USA     | 4685            | 1:1000          |
| P-Akt                | WB                 | BIOSS, Beijing, China     | bs-5193r        | 1:1000          |
| Cyclin D1            | WB                 | CST, Danvers, MA, USA     | 2978            | 1:2000          |
| PIK3CA               | WB                 | Abcam, Cambridge, MA, USA | ab40776         | 1:1000          |
| CDK6                 | WB                 | Abcam, Cambridge, MA, USA | ab151247        | 1:1000          |
| CCNE2 (Cyclin E2)    | WB                 | Abcam, Cambridge, MA, USA | ab40890         | 1:2000          |
| CDK1                 | WB, Co-IP          | Abcam, Cambridge, MA, USA | ab133327        | 1:1000          |
| E2F1                 | WB                 | Abcam, Cambridge, MA, USA | ab179445        | 1:2000          |
| DYKDDDDK Tag         | CO-IP              | CST, Danvers, MA, USA     | 14793           | 1:50            |
| Secondary antibodies |                    |                           |                 |                 |
| Goat<br>Anti-Rabbit  | WB, Co-IP          | Beyotime, Shanghai, China | A0208           | 1:3000          |

WB, Western blotting; Co-IP, co-immunoprecipitation.
